# Supplementary material for: Fluorane sensitive supercapacitive microcrystalline MoO3: dual application in energy storage and HF detection
Source: Royal Society of Chemistry journal article supplement (doi:10.1039/d3ma00357d), 2023-01-01
Supplement: d3ma00357d1.pdf [file d3ma00357d1.pdf]

## Supporting Information

### *Fluorane Sensitive Supercapacitive Microcrystalline MoO<sub>3</sub>: Dual Application in Energy Storage and HF Detection*

Love Bansal<sup>1</sup>, Tanushree Ghosh<sup>1</sup>, Suchita Kandpal<sup>1</sup>, Chanchal Rani<sup>1</sup>, Bhumika Sahu<sup>1</sup>, Deb Kumar Rath<sup>1</sup>, Christoph Wesemann<sup>2,3</sup>, Sandeep Chhoker<sup>4</sup>, Nadja C. Bigall<sup>2,3\*</sup>, and Rajesh Kumar<sup>1,5\*</sup>

<sup>1</sup>Materials and Device Laboratory, Department of Physics, Indian Institute of Technology Indore, Simrol-453552, India

<sup>2</sup>Institute of Physical Chemistry and Electrochemistry (PCI), Gottfried Wilhelm Leibniz University Hannover, Callinstr. 3a, D-30167 Hannover, Germany

<sup>3</sup> Cluster of Excellence PhoenixD (Photonics, Optics and Engineering – Innovation Across Disciplines), Leibniz University Hannover, D-30167 Hannover, Germany

<sup>4</sup> Department of Physics and Material Science and Engineering, Jaypee Institute of Information Technology, Noida, 201307, India

<sup>5</sup>Centre for advanced electronics, Indian Institute of Technology Indore, Simrol-453552, India

<sup>\$</sup>*Current Address: Department of Chemistry, University of Michigan, Ann Arbor, Michigan 48109, United States of America*

\*Email: [rajeshkumar@iiti.ac.in](mailto:rajeshkumar@iiti.ac.in) (RK); [nadja.bigall@pci.uni-hannover.de](mailto:nadja.bigall@pci.uni-hannover.de) (NCB)

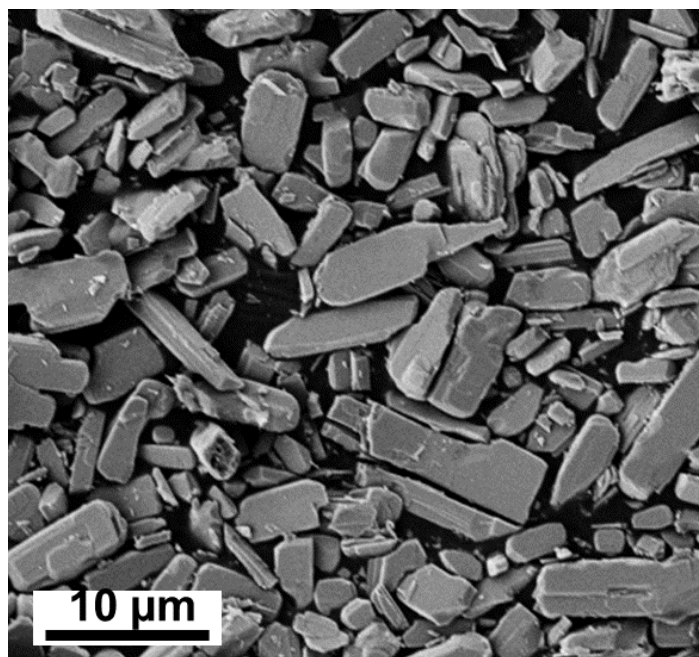

Figure S1: SEM image of MoO<sub>3</sub> under low magnification.

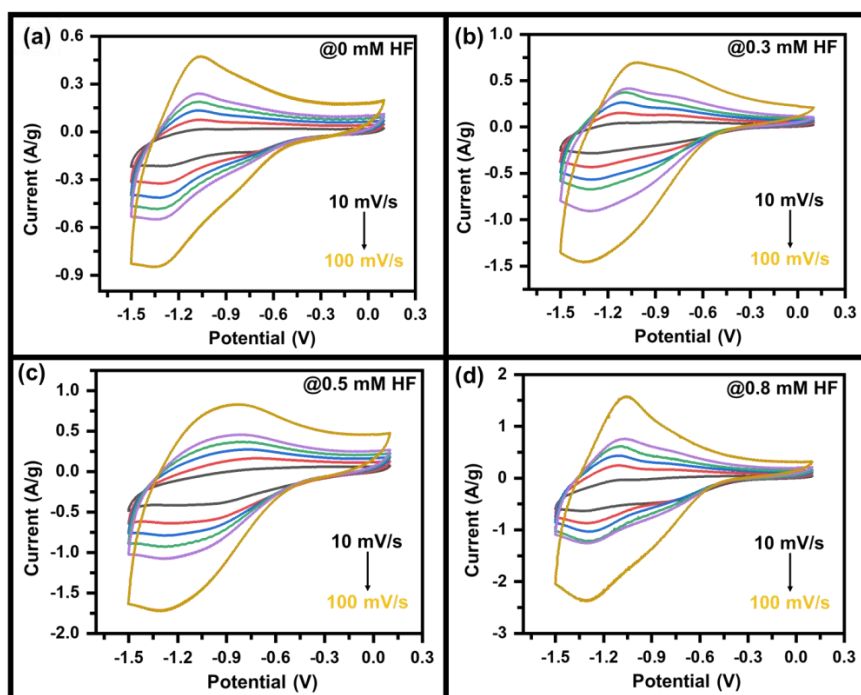

Figure S2: CV graph of MoO<sub>3</sub> at GCE at various concentration of HF (a) 0mM, (b) 0.3mM, (c) 0.5mM, and (d) 0.8mM HF at different scan rates.

### Estimation of specific capacitance

The specific capacitance of active material is calculated From CV curves using the equation<sup>1</sup> as below-

$$C_s = \frac{\oint IdV}{2vm\Delta V} (F/g) , \quad (S1)$$

where  $\oint IdV$  is the area under CV curve, m is the mass of active material on GCE,  $\Delta V$  is potential window of CV curve, and  $v$  is the scan rate. The specific capacitance of active material and prepared symmetric supercapacitor device is also calculated From CV curves and GCD plots using the equation<sup>2</sup> as below-

$$C_s = \frac{I\Delta t_d}{m\Delta V} (F/g) , \quad (S2)$$

where  $\Delta t_d$  is the discharging time.

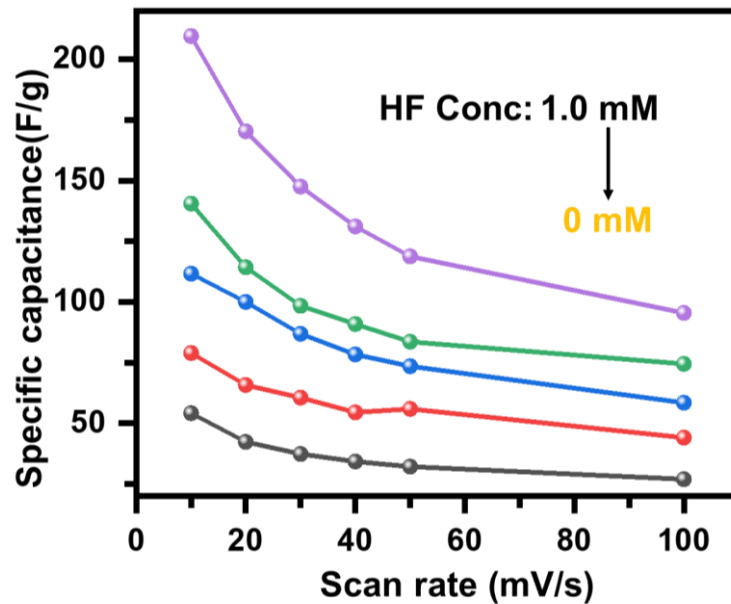

Figure S3: Variation of specific capacitance as a function of scan rate at various concentration of HF acid.

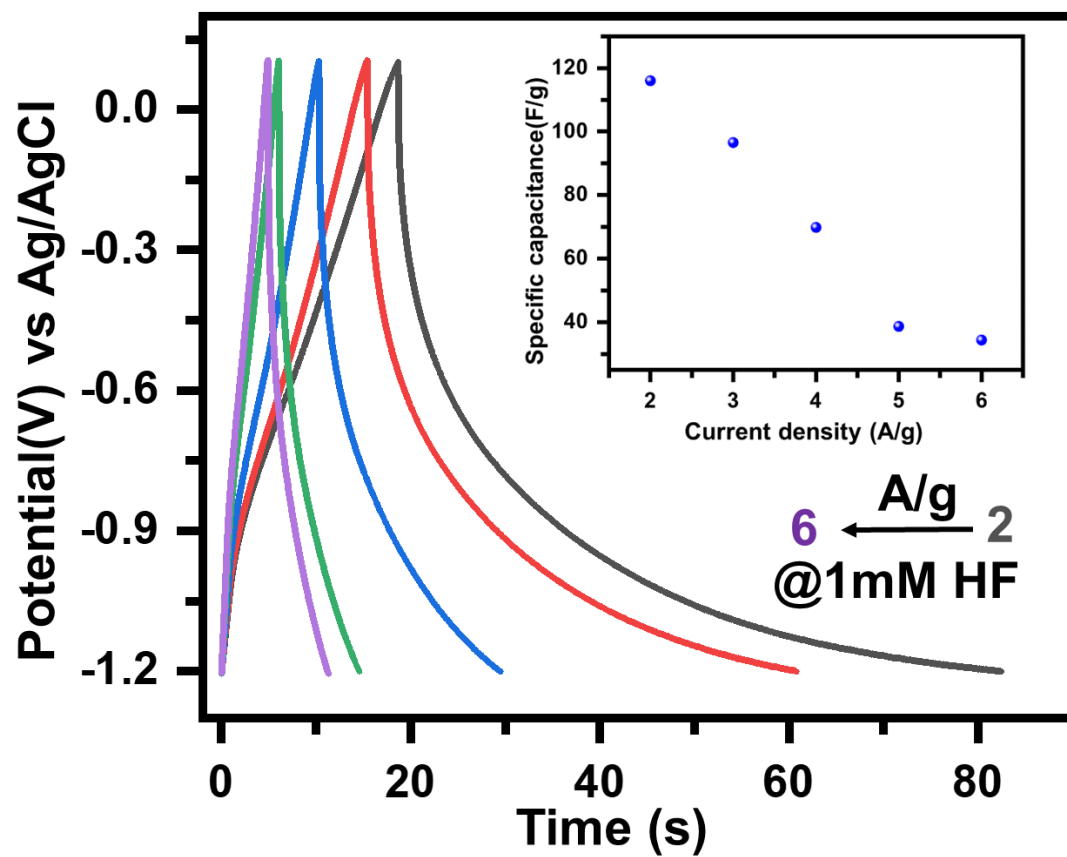

Figure S4: Galvanostatic charging-discharging curve of MoO<sub>3</sub>/GCE with 1mM HF in electrolyte (inset: Variation of specific capacitance as a function of current density).

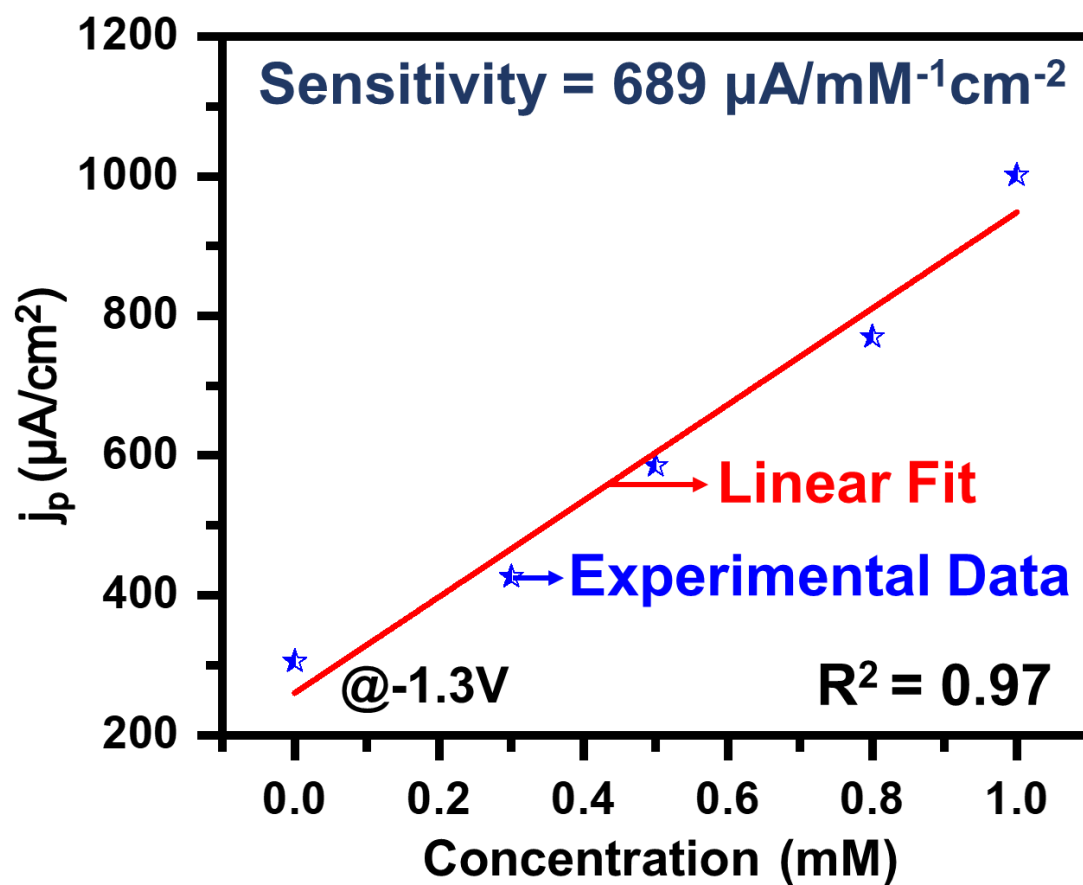

Figure S5: Variation of peak current density with HF concentration.

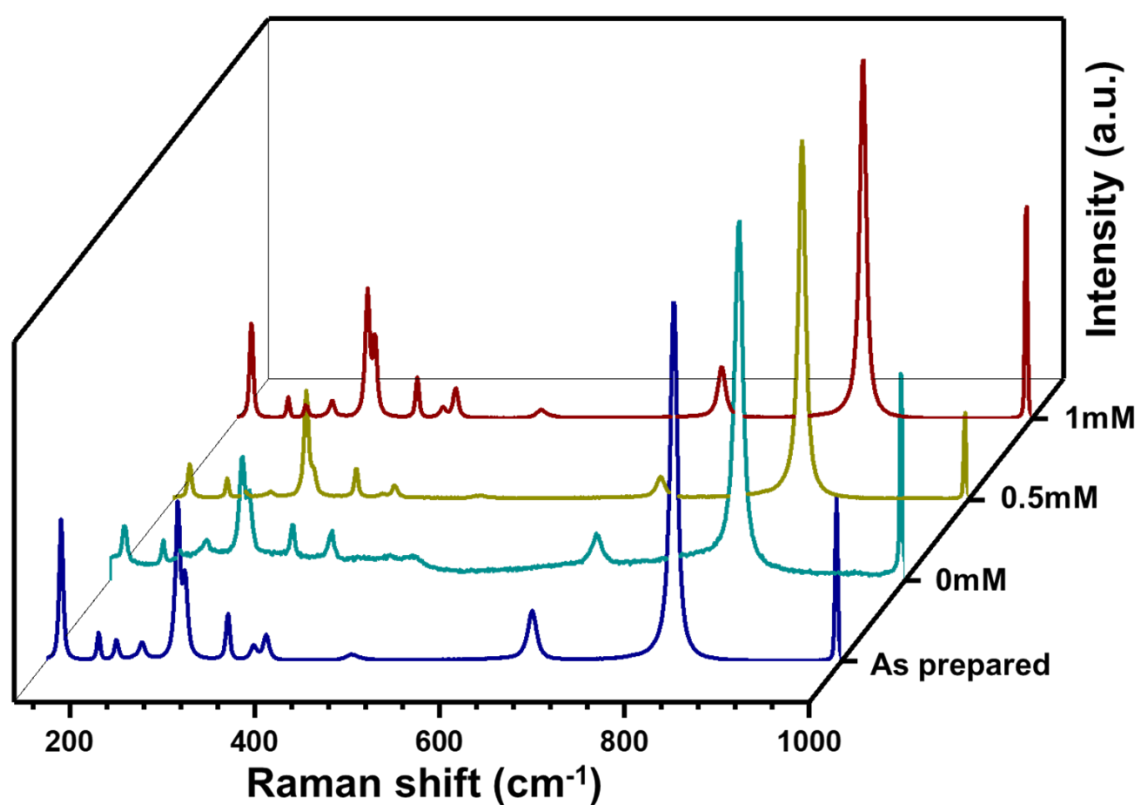

Figure S6: Raman shift of MoO<sub>3</sub> before (as prepared) and after (0mM, 0.5 mM, and 1.0 mM HF+ 0.5M LiClO<sub>4</sub>) electrochemical characterization.

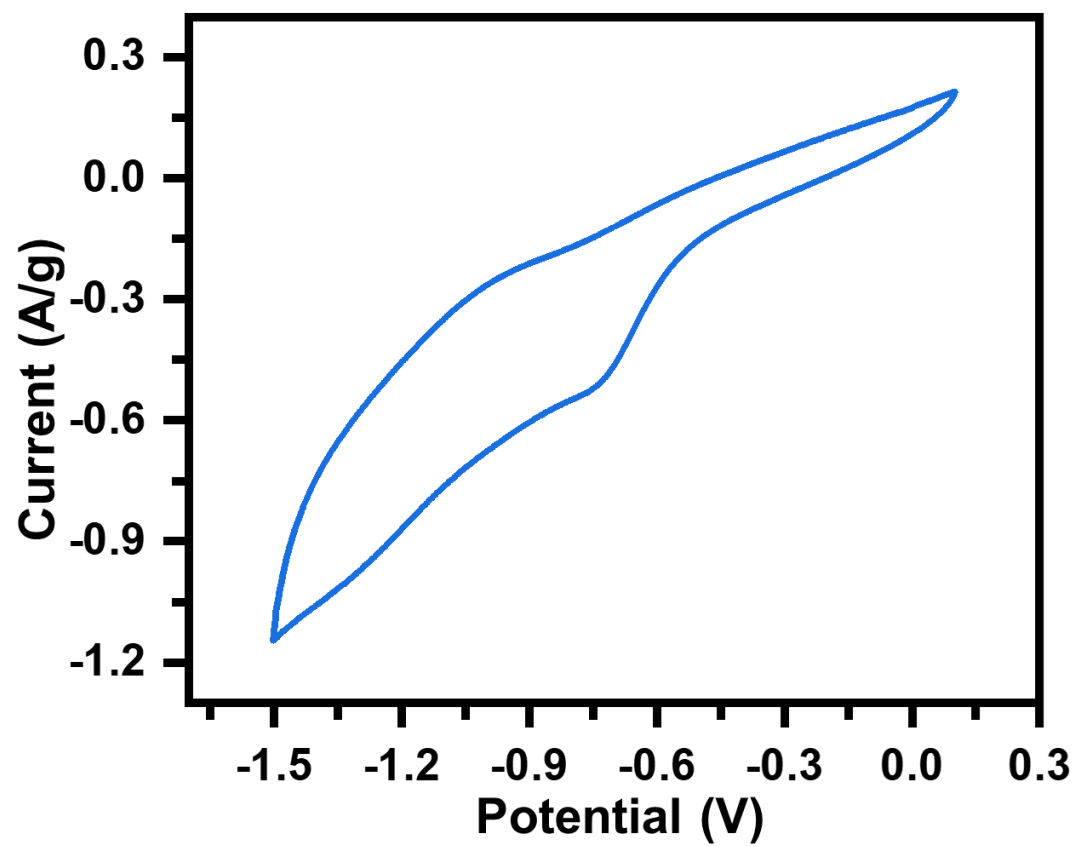

Figure S7: CV graph of MoO<sub>3</sub>/CC at 50 mV/s.

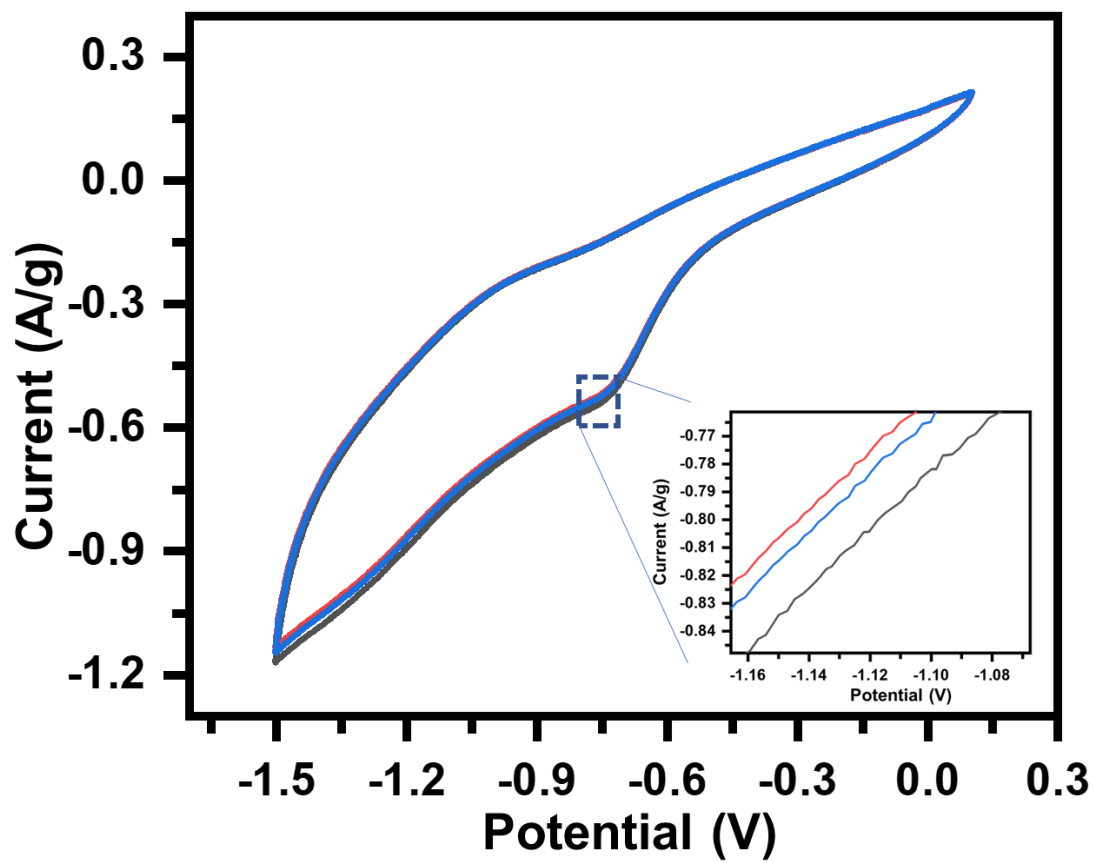

Figure S8: CV curve of MoO<sub>3</sub>/CC on three different batches at 50 mV/s.



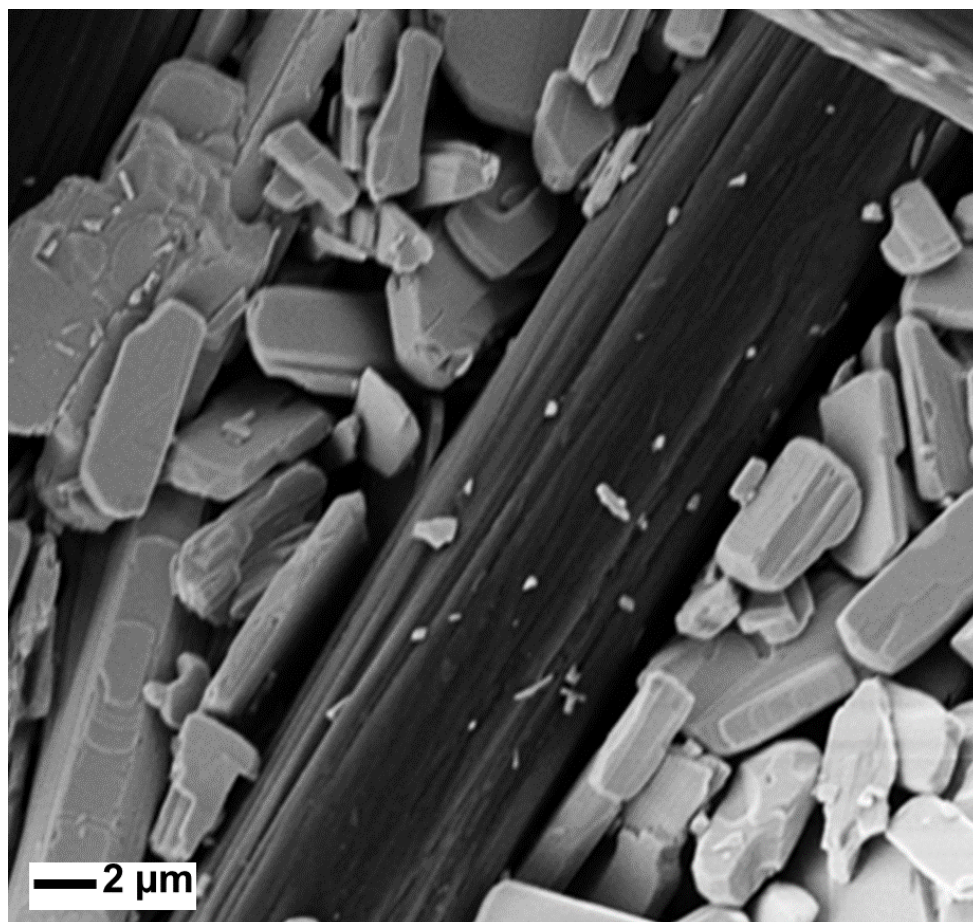

Figure S9: SEM image of MoO<sub>3</sub>/CC

## References

- (1) Yang, P.; Mai, W. Flexible Solid-State Electrochemical Supercapacitors. *Nano Energy* **2014**, *8*, 274–290. <https://doi.org/10.1016/j.nanoen.2014.05.022>.
- (2) Alam, M.; Karmakar, K.; Pal, M.; Mandal, K. Electrochemical Supercapacitor Based on Double Perovskite Y<sub>2</sub>NiMnO<sub>6</sub> Nanowires. *RSC Adv.* **2016**, *6* (115), 114722–114726. <https://doi.org/10.1039/C6RA23318J>.
